# Supplementary material
Source: Springer Nature journal article supplement (https://www.springermedizin.de/resource/supplementary/12913_2008_756_MOESM1_ESM.pdf/9535486)

### **Governance**

- Centrality
- Leadership
- Support for innovation
- Connectivity

### **Shared goals and vision**

- Goals
- Client-centred orientation vs. other allegiances

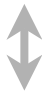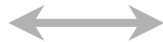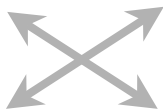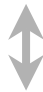

### **Formalization**

- Formalization tools
- Information exchange

### **Internalization**

- Mutual acquaintanceship
- Trust

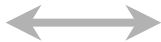

Supplement: MOESM1 [file 9535486]
